# Supplementary material
Source: HighWire-hosted journal article supplement (http://dmd.aspetjournals.org/highwire/filestream/79758/field_highwire_adjunct_files/0/1087_supp_fig1.pdf)
Supplement: 1087_supp_fig1.pdf [file 1087_supp_fig1.pdf]

## Metabolic disposition of triazolam and clobazam in humanized CYP3A mice with a double knockout background of mouse *Cyp2c* and *Cyp3a* genes

Kaoru Kobayashi, Genki Minegishi, Nina Kuriyama, Atsushi Miyajima, Satoshi Abe, Kanako Kazuki, Yasuhiro Kazuki

Drug Metabolism and Disposition

Manuscript Number: DMD-AR-2022-001087

### A. WT

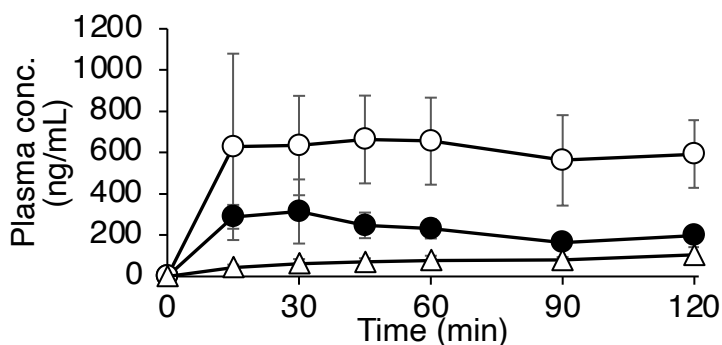

### B. 3aKO

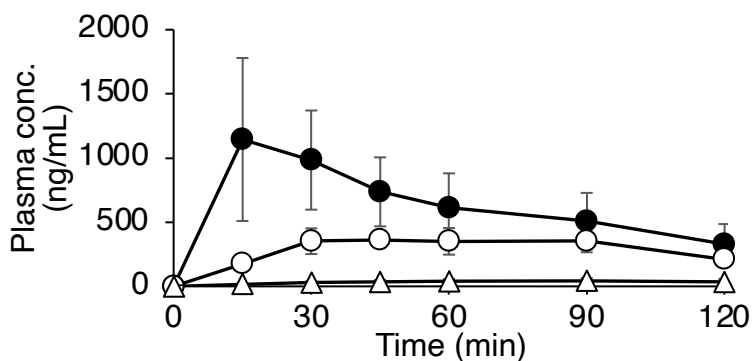

### C. hCYP3A/3aKO

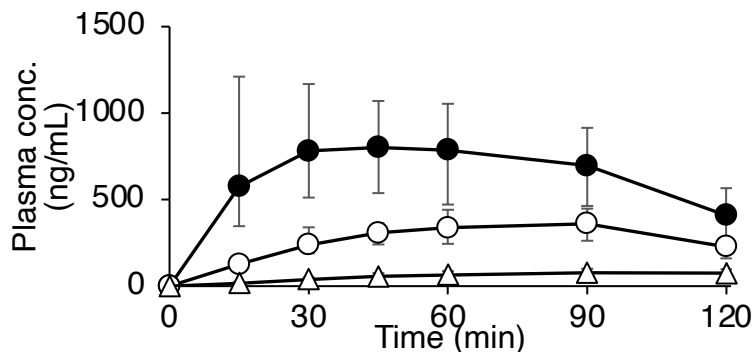

### Supplemental Fig. 1 Plasma concentrations of triazolam, 1'-hydroxytriazolam and 4-hydroxytriazolam in WT (A), 3aKO (B) and hCYP3A/3aKO (C) mice.

Mice (n = 5/group) were given an oral dose of triazolam (2 mg/kg). Plasma concentrations of triazolam (closed circles), 1'-hydroxytriazolam (open circles) and 4-hydroxytriazolam (open triangles) were determined. Each point represents the mean with S. D.
